# Supplementary material
Source: PubMed Central journal article supplement (PMC6468995)
Supplement: NIHMS1004988-supplement-Supplemental.pdf [file NIHMS1004988-supplement-Supplemental.pdf]

## Supplemental Materials

Table S1: Homogeneity of variance test (Levene) estimated for the data obtained from analyzing hemolytic activity in six different *Gambierdiscus* species found in the Caribbean. The analysis examined the differences among species, isolates, growth phase, and species vs. growth phase interaction. For these analyses the data from all three growth phases were considered as part of the same analysis. The differences in hemolytic activity among species in log, late log - stationary phase, and mid-stationary phase were also analyzed separately. The data indicated that only growth phase differences across all species met the homogeneity of variance requirements. The remaining data were therefore analyzed using a Kruskal-Wallis non-parametric ANOVA.

| Source                                      | Degrees of Freedom | F-value | P-value                  |
|---------------------------------------------|--------------------|---------|--------------------------|
| species                                     | 5                  | 22.45   | 6.44 x 10 <sup>-17</sup> |
| strains                                     | 53                 | 2.365   | 8.31 x 10 <sup>-05</sup> |
| Growth phase                                | 2                  | 0.032   | 0.97                     |
| species*growth phase                        | 17                 | 6.09    | 1.82 x 10 <sup>-10</sup> |
| species (log phase)                         | 5                  | 7.14    | 4.59 x 10 <sup>-05</sup> |
| species (late log – early stationary phase) | 5                  | 7.14    | 4.5 x 10 <sup>-05</sup>  |
| species (mid-stationary phase)              | 5                  | 7.14    | 4.59 x 10 <sup>-05</sup> |

Table S2: Non-parametric Kruskal-Wallis ANOVA test was performed to determine if hemolytic activity was significantly different among species when the log, late log - early stationary, and mid-stationary phase data were considered together or separately. The results indicated that each of these analyses were highly significant confirming that interspecific differences in hemolytic activity exist. This was true whether the EC<sub>50</sub> data for all three growth phases were combined or considered separately.

| Source                                         | H-Statistic | df | P-value                  |
|------------------------------------------------|-------------|----|--------------------------|
| Species (all three phases considered together) | 69.95       | 5  | 1.05 x 10 <sup>-13</sup> |
| Species (log phase )                           | 24.74       | 5  | 0.000156                 |
| Species (late log – early stationary phase)    | 20.32       | 5  | 0.001088                 |
| Species (mid-stationary phase)                 | 27.88       | 5  | 3.84 x 10 <sup>-05</sup> |

Table S3. A. Non-parametric multiple comparison test to determine which species had statistically different hemolytic activity. The data indicated that hemolytic activity in *G. carolinianus* was statistically lower than all the other species tested. *Gambierdiscus* ribotype 2 and *G. ruetzleri* were the two most toxic species and were significantly different from *G. caribaeus*, which had similar toxicities as *G. belizeanus* and *G. carpenteri*. Analyzing each growth phase separately weakened the analysis to the degree that only differences between *G. carolinianus* and certain other species were statistically significant (data not shown). B. The same non-parametric multiple comparisons test based on the EC<sub>50</sub> data normalized to biovolume. These data again support at least three hemolytic activity groups consisting of (a) *G. carolinianus*; (b) *G. belizeanus*, *G. caribaeus*, and *G. carpenteri*; and (c) *G. ruetzleri* and *Gambierdiscus* ribotype 2.

A.

| Comparison Groups                                       | Obs dif | Critical dif | difference |
|---------------------------------------------------------|---------|--------------|------------|
| <i>G. caribaeus</i> - <i>G. carolinianus</i>            | 37.09   | 25.963       | TRUE       |
| <i>G. belizeanus</i> - <i>G. carolinianus</i>           | 62.33   | 50.279       | TRUE       |
| <i>Gambierdiscus</i> ribotype 2- <i>G. carolinianus</i> | 108.11  | 50.276       | TRUE       |
| <i>G. carpenteri</i> - <i>G. carolinianus</i>           | 61.83   | 38.399       | TRUE       |
| <i>G. ruetzleri</i> - <i>G. carolinianus</i>            | 107.67  | 59.842       | TRUE       |
| <i>G. belizeanus</i> - <i>G. caribaeus</i>              | 25.24   | 48.572       | FALSE      |
| <i>Gambierdiscus</i> ribotype 2- <i>G. caribaeus</i>    | 71.02   | 48.572       | TRUE       |
| <i>G. carpenteri</i> - <i>G. caribaeus</i>              | 24.74   | 36.138       | FALSE      |
| <i>G. ruetzleri</i> - <i>G. caribaeus</i>               | 70.57   | 58.416       | TRUE       |
| <i>Gambierdiscus</i> ribotype 2- <i>G. belizeanus</i>   | 45.78   | 64.907       | FALSE      |
| <i>G. carpenteri</i> - <i>G. belizeanus</i>             | 0.5     | 56.211       | FALSE      |
| <i>G. ruetzleri</i> - <i>G. belizeanus</i>              | 45.33   | 72.568       | FALSE      |
| <i>G. carpenteri</i> - <i>Gambierdiscus</i> ribotype 2  | 46.28   | 56.211       | FALSE      |
| <i>G. ruetzleri</i> - <i>Gambierdiscus</i> ribotype 2   | 0.44    | 72.568       | FALSE      |
| <i>G. ruetzleri</i> - <i>G. carpenteri</i>              | 45.83   | 64.907       | FALSE      |

B.

| Comparison Group                           | Obs dif | Critical dif | difference |
|--------------------------------------------|---------|--------------|------------|
| <i>G. belizeanus</i> - <i>G. caribaeus</i> | 3.79    | 48.571       | FALSE      |

|                                                 |        |        |       |
|-------------------------------------------------|--------|--------|-------|
| <i>G. belizeanus-G. carolinianus</i>            | 41.06  | 50.271 | FALSE |
| <i>G. belizeanus-G. carpenteri</i>              | 1.55   | 56.211 | FALSE |
| <i>G. belizeanus-Gambierdiscus ribotype 2</i>   | 49.33  | 64.907 | FALSE |
| <i>G. belizeanus-G. ruetzleri</i>               | 59.61  | 72.568 | FALSE |
| <i>G. caribaeus-G. carolinianus</i>             | 37.27  | 25.962 | TRUE  |
| <i>G. caribaeus-G. carpenteri</i>               | 2.24   | 36.133 | FALSE |
| <i>G. caribaeus-Gambierdiscus ribotype 2</i>    | 53.12  | 48.571 | TRUE  |
| <i>G. caribaeus-G. ruetzleri</i>                | 63.47  | 58.416 | TRUE  |
| <i>G. carolinianus-G. carpenteri</i>            | 39.51  | 38.399 | TRUE  |
| <i>G. carolinianus-Gambierdiscus ribotype 2</i> | 90.45  | 50.276 | TRUE  |
| <i>G. carolinianus-G. ruetzleri</i>             | 100.67 | 59.841 | TRUE  |
| <i>G. carpenteri-Gambierdiscus ribotype 2</i>   | 50.88  | 56.211 | FALSE |
| <i>G. carpenteri-G. ruetzleri</i>               | 61.16  | 64.907 | FALSE |
| <i>Gambierdiscus ribotype 2-G. ruetzleri</i>    | 10.27  | 72.568 | FALSE |

---

Table S4. Growth rate and EC<sub>50</sub> cell estimates ± 1 standard deviation for *G. caribaeus* and *G. carolinianus* isolates from the different regions grown at 27°C. Region 1 = western Gulf of Mexico and Caribbean. Region 2 = eastern Gulf of Mexico and Caribbean, and Region 3 = continental shelf off the coast of North Carolina, USA.

| <b>Growth rate ± SD in Log, Late Log – Early Stationary and Mid-Stationary Phase</b> |                |            |                     |                                    |                     |                       |                     |
|--------------------------------------------------------------------------------------|----------------|------------|---------------------|------------------------------------|---------------------|-----------------------|---------------------|
| <b>n</b>                                                                             | <b>Species</b> | <b>Log</b> | <b>St deviation</b> | <b>Late log – early stationary</b> | <b>St deviation</b> | <b>Mid-stationary</b> | <b>St deviation</b> |
| <i>G. caribaeus</i>                                                                  |                |            |                     |                                    |                     |                       |                     |
| 15                                                                                   | Region 1       | 0.16       | 0.05                | 0.07                               | 0.04                | 0.01                  | 0.01                |
| 11                                                                                   | Region 2       | 0.16       | 0.03                | 0.09                               | 0.03                | 0.01                  | 0.01                |
| <i>G. carolinianus</i>                                                               |                |            |                     |                                    |                     |                       |                     |
| 5                                                                                    | Region 1       | 0.18       | 0.04                | 0.09                               | 0.02                | 0.04                  | 0.02                |
| 5                                                                                    | Region 2       | 0.17       | 0.05                | 0.10                               | 0.03                | 0.06                  | 0.02                |
| 5                                                                                    | Region 3       | 0.23       | 0.05                | 0.10                               | 0.03                | 0.05                  | 0.01                |
| <i>G. ruetzleri</i>                                                                  |                |            |                     |                                    |                     |                       |                     |
| 1                                                                                    | Region 1       | 0.25       |                     | 0.07                               |                     | 0.03                  |                     |
| 1                                                                                    | Region 3       | 0.19       |                     | 0.14                               |                     | 0.05                  |                     |

| <b>EC<sub>50</sub> cells ± SD in Log, Late Log and Stationary Phase</b> |                |            |                     |                 |                     |                         |                     |
|-------------------------------------------------------------------------|----------------|------------|---------------------|-----------------|---------------------|-------------------------|---------------------|
| <b>n</b>                                                                | <b>Species</b> | <b>Log</b> | <b>St deviation</b> | <b>Late Log</b> | <b>St deviation</b> | <b>Stationary Phase</b> | <b>St deviation</b> |
| <i>G. caribaeus</i>                                                     |                |            |                     |                 |                     |                         |                     |
| 15                                                                      | Region 1       | 133.48     | 42.29               | 91.78           | 34.83               | 183.33                  | 60.63               |
| 11                                                                      | Region 2       | 263.67     | 43.82               | 176.37          | 38.47               | 293.93                  | 39.94               |
| <i>G. carolinianus</i>                                                  |                |            |                     |                 |                     |                         |                     |
| 5                                                                       | Region 1       | 171.27     | 33.08               | 109.23          | 28.41               | 222.03                  | 32.46               |
| 5                                                                       | Region 2       | 1673.20    | 856.89              | 1468.84         | 798.49              | 1773.97                 | 888.30              |
| 5                                                                       | Region 3       | 10432.87   | 950.32              | 9878.46         | 990.46              | 11153.48                | 873.38              |
| <i>G. ruetzleri</i>                                                     |                |            |                     |                 |                     |                         |                     |
| 1                                                                       | Region 1       | 12.20      |                     | 6.78            |                     | 20.34                   |                     |

1

Region 3

69.16

42.71

80.68

---

Table S5: The data for *G. caribaeus* and *G. carolinianus* were further analyzed with respect to differences in hemolytic activity among regions where the isolates originated and with respect to log, late log-early stationary and mid-stationary growth phase. A Levene homogeneity of variance test indicated that only the *G. carolinianus* regional comparisons failed to meet the homogeneity of variance tests.

| Source                                  | df | F     | P                       |
|-----------------------------------------|----|-------|-------------------------|
| Growth phase ( <i>G. caribaeus</i> )    | 2  | 1.09  | 0.340                   |
| Growth phase ( <i>G. carolinianus</i> ) | 2  | 0.04  | 0.957                   |
| Region ( <i>G. caribaeus</i> )          | 1  | 0.47  | 0.493                   |
| Region ( <i>G. carolinianus</i> )       | 2  | 12.16 | 6.78 x 10 <sup>-5</sup> |

Table S6. Results of an ANOVA testing whether the regional differences in hemolytic activity within *G. caribaeus* were significantly different. The data indicated that regional differences in hemolytic activity were statically significant when the data for all three growth phases were combined.

| Source                         | df | Sum Sq | Mean Sq | F     | Pr(>F)                 |
|--------------------------------|----|--------|---------|-------|------------------------|
| Region ( <i>G. caribaeus</i> ) | 1  | 217391 | 217391  | 57.17 | 9.36x10 <sup>-11</sup> |
| Residuals                      | 73 | 277565 | 3802.26 | NA    | NA                     |

Table S7. A Kruskal-Wallis non-parametric ANOVA was conducted to estimate whether hemolytic activity varies significantly by region for *G. caribaeus* and *G. carolinianus* and for *G. carolinianus* alone. The analysis again supported a significant difference in hemolytic activity among regions for both species.

| Source                | H-Statistic | df | P                        |
|-----------------------|-------------|----|--------------------------|
| Region (both species) | 71.95       | 2  | 2.37 x 10 <sup>-16</sup> |

Region (*G. carolinianus*)

34.54

2

$3.15 \times 10^{-8}$

---



Table S8. Comparison test for differences among regions in hemolytic activity examined the *G. carolinianus* data in more detail. The results indicated that region 3 was significantly different from regions 1 and 2, but that regions 1 and 2 were not statistically different. The failure to detect a significant difference among regions 1 and 2, despite an order of magnitude difference in average hemolytic activity was likely due to the low power of the non-parametric test.

| Comparison Group ( <i>G. carolinianus</i> ) | Obs dif | Critical dif | difference |
|---------------------------------------------|---------|--------------|------------|
| Region 2 - Region 1                         | 10.93   | 11.48        | FALSE      |
| Region 3 – Region 1                         | 27.96   | 11.48        | TRUE       |
| Region 3 – Region 2                         | 17.03   | 11.48        | TRUE       |

Table S9. An ANOVA testing whether hemolytic activity varied with growth phases in *G. caribaeus* only. The results indicated that hemolytic activity varied significantly with growth phase.

| Source                               | df | Sum Sq | Mean Sq | F     | Pr(>F)                  |
|--------------------------------------|----|--------|---------|-------|-------------------------|
| Growth phase ( <i>G. caribaeus</i> ) | 2  | 134349 | 67174.3 | 13.42 | 1.12 x 10 <sup>-5</sup> |
| Residuals                            | 72 | 360607 | 5008.44 | NA    | NA                      |

Table S10. Comparison test for differences in hemolytic activity among the various growth phases of *G. caribaeus*. The data indicated that the difference between log, late log - early stationary, and mid-stationary phases were significantly different from one another. The log and mid stationary phases, however, did not show a statistically significant difference in hemolytic activity.

| Comparison Groups ( <i>G. caribaeus</i> )            | diff   | lower   | upper  | p adj                   |
|------------------------------------------------------|--------|---------|--------|-------------------------|
| Log vs. late log - early stationary phase            | -61.76 | -109.67 | -13.86 | 0.009                   |
| Log vs. mid-stationary phase                         | 41.22  | -6.67   | 89.13  | 0.11                    |
| Late log - early stationary vs. mid-stationary phase | 102.99 | 55.08   | 150.89 | 6.60 x 10 <sup>-6</sup> |

Table S11. The results of an ANOVA testing whether hemolytic activity varied significantly with growth phase in *G. carolinianus*. The results again indicated no significant difference in hemolytic activity with growth phase.

| Source                                  | df | Sum Sq    | Mean Sq  | F     | Pr(>F) |
|-----------------------------------------|----|-----------|----------|-------|--------|
| Growth phase ( <i>G. carolinianus</i> ) | 2  | 2389103.2 | 1194552  | 0.052 | 0.949  |
| Residuals                               | 42 | 961011804 | 22881233 | NA    | NA     |

Table S12. Levene Homogeneity of variance test for the temperature experiment *G. caribaeus* and *G. carolinianus* were grown at 20, 24, 27, and 31°C. The MTX EC<sub>50</sub> values were estimated in log, late log -early stationary and mid-stationary phase for both species. The only data set which failed the homogeneity of variance test was the temperature data set for *G. caribaeus*.

| Source                                              | df | F     | P                       |
|-----------------------------------------------------|----|-------|-------------------------|
| Temperature (both species combined)                 | 3  | 0.032 | 0.992                   |
| Growth phase (both species combined)                | 2  | 0.037 | 0.962                   |
| Temperature*Growth phase (both species combined)    | 11 | 0.016 | 1                       |
| Temperature ( <i>G. caribaeus</i> )                 | 3  | 8.616 | 8.55 x 10 <sup>-5</sup> |
| Growth phase ( <i>G. caribaeus</i> )                | 2  | 0.013 | 0.986                   |
| Temperature*Growth phase ( <i>G. caribaeus</i> )    | 11 | 1.963 | 0.053                   |
| Temperature ( <i>G. carolinianus</i> )              | 3  | 0.051 | 0.984                   |
| Growth phase ( <i>G. carolinianus</i> )             | 3  | 0.051 | 0.984                   |
| Temperature*Growth phase ( <i>G. carolinianus</i> ) | 11 | 0.024 | 1                       |

Table S13. A. The temperature data for *G. caribaeus* failed the homogeneity of variance test, hence a Kruskal-Wallis non-parametric ANOVA was used to test whether hemolytic activity varied with temperature. All three growth phases were included in the analysis at each temperature. The data indicated that hemolytic activity significantly increased with increasing growth temperatures. B. A multiple comparison test was undertaken using the same data set to test which temperatures exhibited statistically significant different levels of hemolytic activity. The data indicated that the statistical significance in the analysis reported in 13A was due to the differences in hemolytic activity between the isolates grown as 20 and 27 °C.

A.

| Source                              | df | H-Statistic | P     |
|-------------------------------------|----|-------------|-------|
| Temperature ( <i>G. caribaeus</i> ) | 3  | 9.060       | 0.028 |

B.

| Comparison Groups ( <i>G. caribaeus</i> ) | Obs dif | Critical dif | difference |
|-------------------------------------------|---------|--------------|------------|
| 20°C-24°C                                 | 4.83    | 16.82        | FALSE      |
| 20°C-27°C                                 | 17.36   | 16.82        | TRUE       |
| 20°C-31°C                                 | 13      | 16.82        | FALSE      |
| 24°C-27°C                                 | 12.53   | 16.82        | FALSE      |
| 24°C-31°C                                 | 8.16    | 16.82        | FALSE      |
| 27°C-31°C                                 | 4.36    | 16.82        | FALSE      |

Table S14. A) Temperature experiment ANOVA which tested whether hemolytic activity in *G. caribaeus* varied significantly with growth phase. The analysis indicated that hemolytic activity did indeed increase significantly with an increase in growth temperature. B. A multiple comparisons test was done using the same data set to determine which growth phases contained statistically different levels of hemolytic activity. The test specifically examined the difference in hemolytic activity between log and late log - early stationary phase, log phase and mid-stationary phase, and between late log - early stationary and mid-stationary phase. The results indicated that the only significant difference in hemolytic activity was between in late log, early stationary phase and mid stationary phase.

A.

| Source                               | Df | Sum Sq   | Mean Sq  | F     | Pr(>F) |
|--------------------------------------|----|----------|----------|-------|--------|
| Growth phase ( <i>G. caribaeus</i> ) | 2  | 44094.1  | 22047.05 | 4.346 | 0.017  |
| Residuals                            | 57 | 289115.9 | 5072.209 | NA    | NA     |

B.

| Comparison Groups ( <i>G. caribaeus</i> )                          | diff  | Lower  | Upper  | p adj |
|--------------------------------------------------------------------|-------|--------|--------|-------|
| Transition from log to late log - early stationary phase           | -27.1 | -81.29 | 27.09  | 0.456 |
| Transition from log to mid-stationary phase                        | 38.95 | -15.24 | 93.14  | 0.203 |
| Transition from late log -early stationary to mid-stationary phase | 66.05 | 11.85  | 120.24 | 0.013 |

Table S15. ANOVA test on the individual effects and interactions of temperature and growth phase on hemolytic activity in *G. carolinianus*. The results indicated that there was no significant difference among the isolates of *G. carolinianus*.

| Source                                                | Df | Sum Sq                | Mean Sq  | F     | Pr(>F) |
|-------------------------------------------------------|----|-----------------------|----------|-------|--------|
| Temperature ( <i>G. carolinianus</i> )                | 3  | 4615937               | 1538646  | 0.047 | 0.986  |
| Growth phase ( <i>G. carolinianus</i> )               | 2  | 3684998               | 1842499  | 0.056 | 0.944  |
| Temperature * Growth phase ( <i>G. carolinianus</i> ) | 6  | 739404.8              | 123234.1 | 0.003 | 1      |
| Residuals                                             | 60 | 1.95x 10 <sup>9</sup> | 32482229 | NA    | NA     |
